# Supplementary material
Source: PubMed Central journal article supplement (PMC3182467)
Supplement: NIHMS322993-supplement-01.pdf [file NIHMS322993-supplement-01.pdf]

## **List of Supplementary Material**

### **The Complete Dataset of ECGI-Imaged Human Ventricular Tachycardias**

#### **CONTROL: NORMAL VENTRICULAR ACTIVATION PATTERN (MOVIE N1)**

#### **RIGHT VENTRICULAR TACHYCARDIAS (RV1-RV11)**

Figure RV1: ECGI of an anterior-left RVOT tachycardia

Figure RV2: ECGI of a mid-septal RVOT tachycardia

Figure RV3: ECGI of a mid-septal RVOT tachycardia

Figure RV4: ECGI of a posterior-right RVOT tachycardia

Figure RV5: ECGI of an anterior left RVOT tachycardia

Figure RV6: ECGI of a free wall RVOT tachycardia

Figure RV7: ECGI of a mid-septal RVOT tachycardia (WITH MOVIE RV7)

Figure RV8: ECGI of a free wall RVOT tachycardia

Figure RV9: ECGI of a midseptal RVOT tachycardia (WITH MOVIE RV9)

Figure RV10: ECGI of an RV base tachycardia

Figure RV11: ECGI of a posterior-right RVOT tachycardia (WITH MOVIE  
RV11)

#### **LEFT VENTRICULAR TACHYCARDIAS (LV1-LV15)**

Figure LV1: ECGI of a focal ventricular tachycardia induced by programmed  
electrical stimulation (WITH MOVIE LV1)

Figure LV2: ECGI of reentrant VT from inferobasal scar (WITH MOVIE LV2)

Figure LV3: ECGI of a reentrant VT from mid-lateral LV (lateral wall infiltrative  
cardiomyopathy) (WITH MOVIE LV3)

Figure LV4: ECGI of left posterior fascicular VT (WITH MOVIE LV4)

Figure LV5: ECGI of a left fascicular VT (WITH MOVIE LV5)

Figure LV6: ECGI of an epicardial anterior basal focal VT

Figure LV7: ECGI of tachycardia originating in the left coronary cusp of the aorta

Figure LV8: ECGI of a basal mitral annular PVC

Figure LV9: ECGI of an inferior septal VT

Figure LV10: ECGI of an inferior lateral mitral annular PVC

Figure LV11: ECGI of apical scar related reentrant VT (WITH MOVIE LV11)

Figure LV12: ECGI of an inferior basal LV PVC (WITH MOVIE LV12)

Figure LV13: ECGI of pleomorphic PVCs from the posterolateral LV (WITH MOVIE LV13)

Figure LV14: ECGI of a VT from the anterior-apical LV in a patient with an apical aneurysm (WITH MOVIE LV14)

Figure LV 15: ECGI of a VT from the anterior interventricular vein/distal coronary sinus

**Table S1. Results from EP Studies**
